# Supplementary material
Source: PubMed Central journal article supplement (PMC6948196)
Supplement: NIHMS1058065-supplement-Supp_FigS1-3.pdf [file NIHMS1058065-supplement-Supp_FigS1-3.pdf]

Live

Dead

CM+

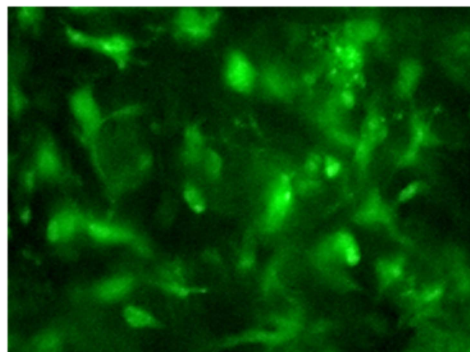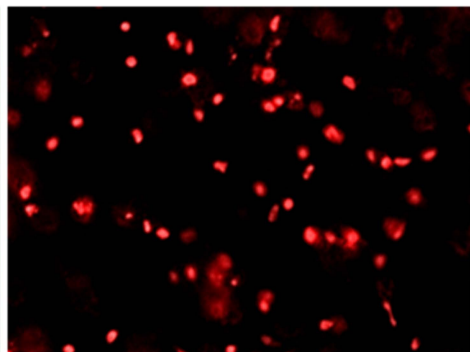

DEX-

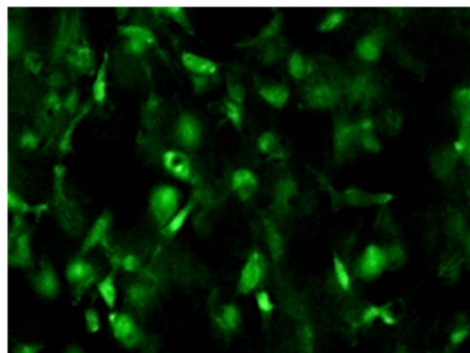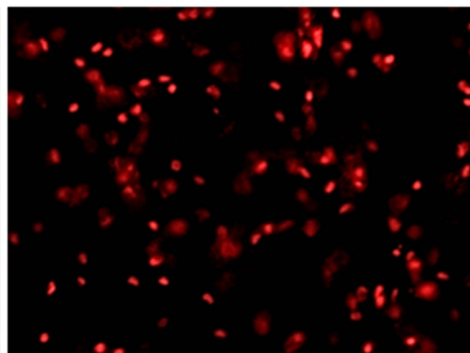

ITS/BSA/LA-

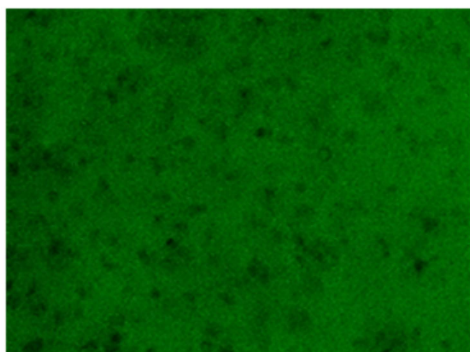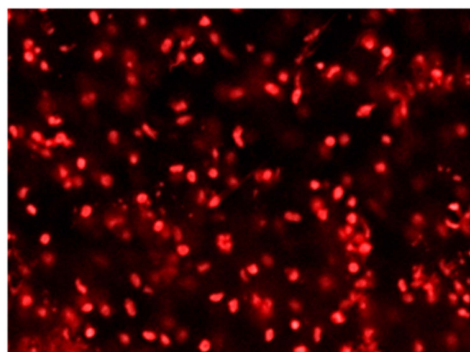

BM+

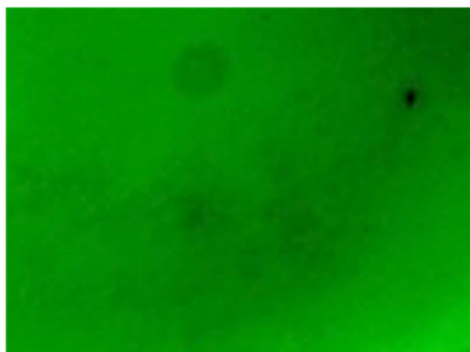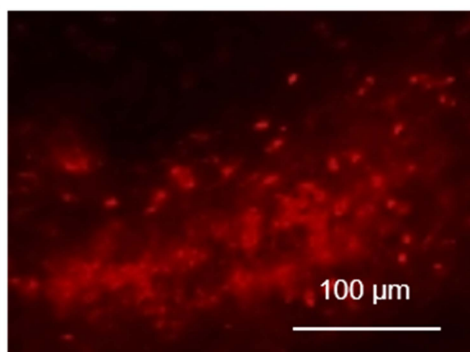

100 μm

Live

Dead

Edge

Center

C-C

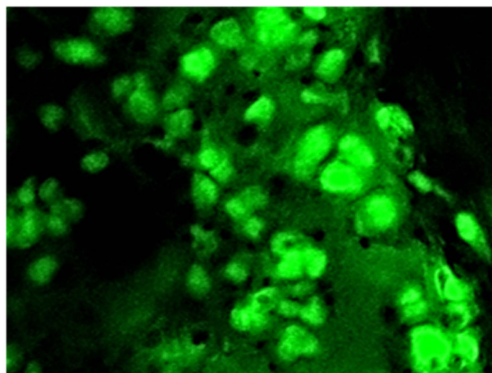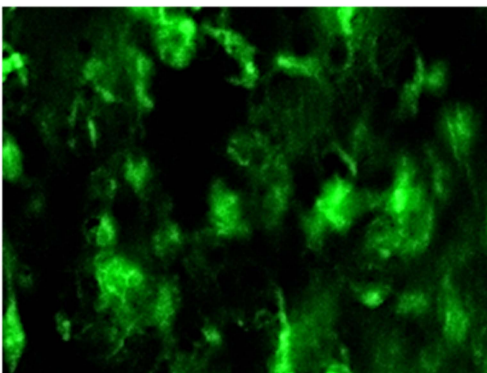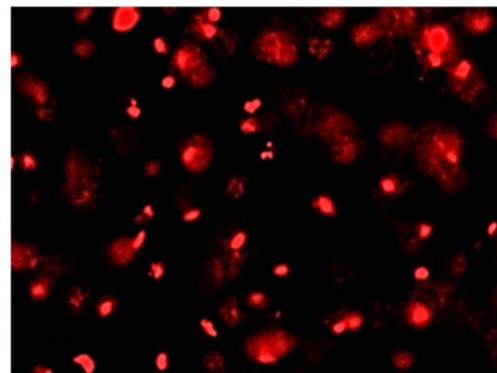

C-D

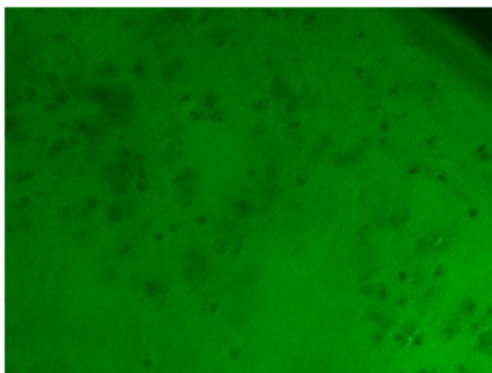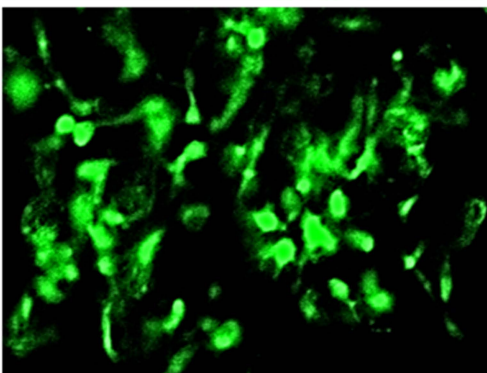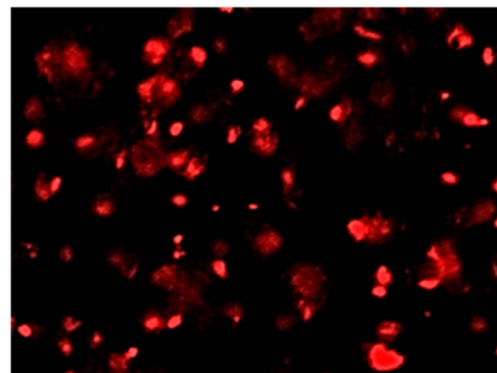

D-C

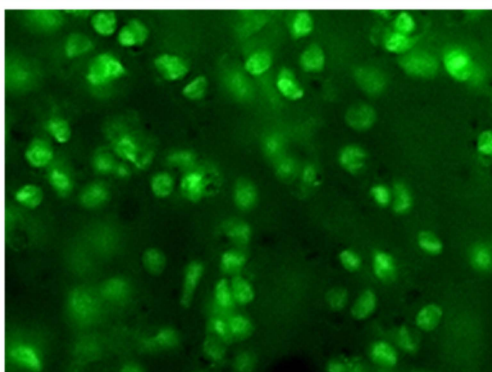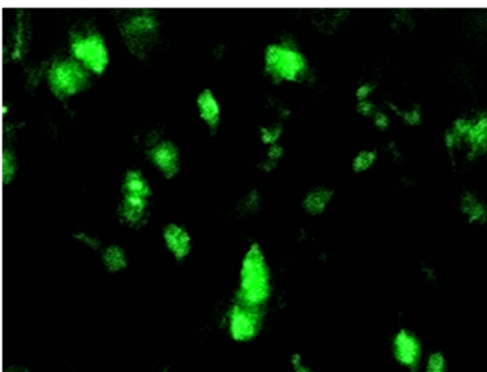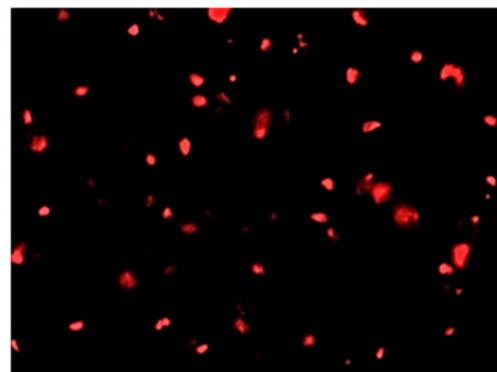

D-D

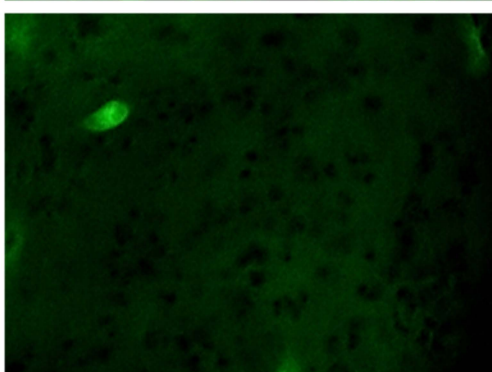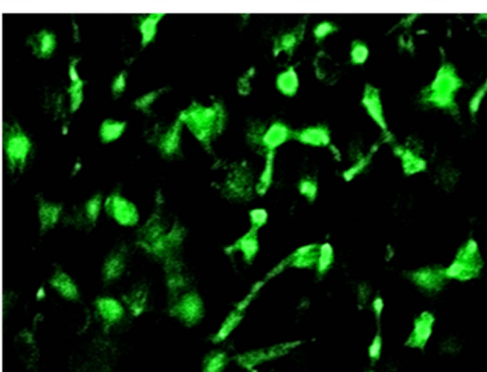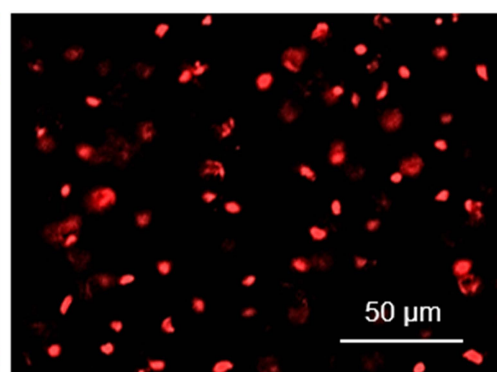50  $\mu$ m

Live

Dead

CM+

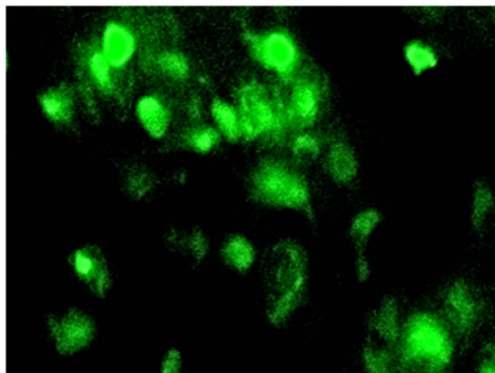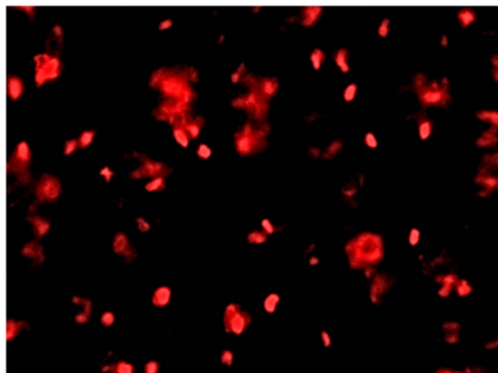

CM+ to S(T+/D+)

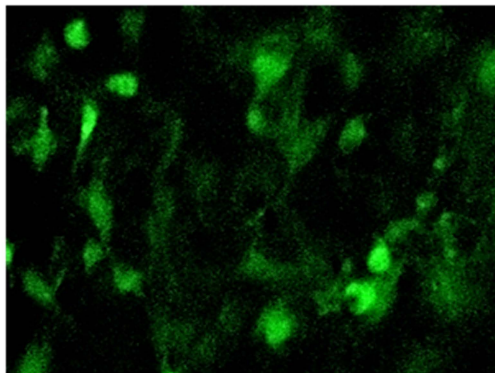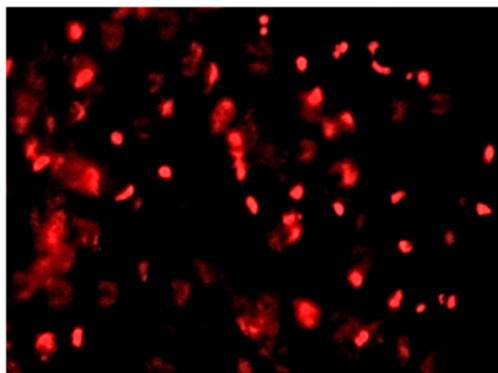

CM+ to S(T+/D-)

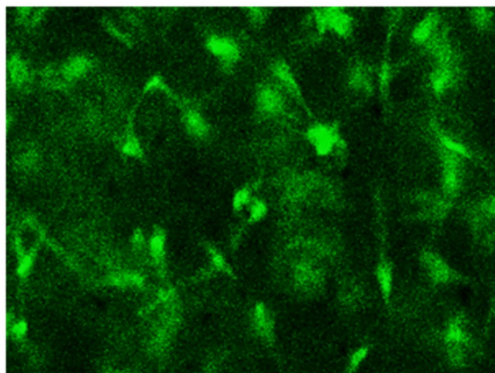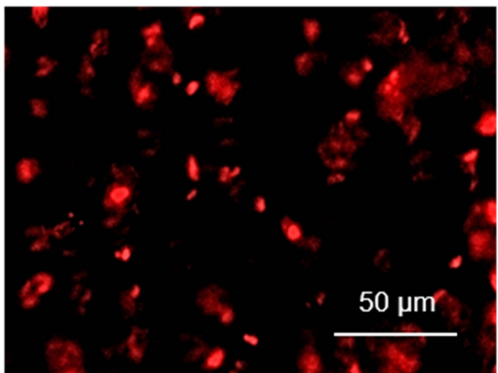

50  $\mu$ m
